# Supplementary material for: Fall risk prediction ability in rehabilitation professionals: structural equation modeling using time pressure test data for Kiken-Yochi Training
Source: PeerJ journal article supplement (doi:10.7717/peerj.16724), 2024-01-03
Supplement: Rawdata.xlsx [file Rawdata.xlsx]

## Sheet: rawdate,N=402
ID	Gender;0＝Men,1=Women	Age	0=PT student,1=OT student,2=PT, 3=OT	1=Reha,0=Reha student	Reha=Years of experience,0=Reha student	Years of experience,Year in school indicates grade level	Scene1,item1	Scene1,item2	Scene1,item3	Scene1,item4	Scene1,item5	Scene2,item6	Scene2,item7	Scene2,item8	Scene2,item9	Scene2,item10	Scene3,item11	Scene3,item12	Scene3,item13	Scene3,item14	Scene3,item15	Scene4,item16	Scene4,item17	Scene4,item18	Scene4,item19	Scene5,item20	Scene5,item21	Scene5,item22	Scene5,item23	Scene5,item24	HE,4,18,23,24	PE,6,8,9,11,12,13,16,17,19,21	PA,1,2,3,5,7,10,14,15,20,22	HE correction score	PE correction score	PA correction score	HE full score	PE full score	PA full score
1	1	19	1	0	0	1	0	0	0	0	0	0	0	0	0	0	25	40	0	0	0	25	10	35	0	0	15	0	0	40	75	115	0	0.75	0.621622	0	100	185	140
2	1	19	1	0	0	1	0	0	0	0	0	30	0	0	0	0	25	40	0	0	0	0	0	0	0	0	0	15	0	0	0	95	15	0	0.513514	0.107143	100	185	140
3	1	18	1	0	0	1	0	0	0	15	0	0	0	0	0	0	0	40	0	0	0	0	0	0	0	0	0	0	0	0	15	40	0	0.15	0.216216	0	100	185	140
4	1	30	1	0	0	1	0	0	0	0	0	0	0	0	15	0	0	40	0	0	0	0	0	35	0	0	15	0	0	0	35	70	0	0.35	0.378378	0	100	185	140
5	1	19	1	0	0	1	0	0	15	0	0	30	0	0	0	0	0	0	0	0	0	0	0	0	0	0	0	0	0	0	0	30	15	0	0.162162	0.107143	100	185	140
6	1	19	1	0	0	1	0	0	0	0	5	0	0	0	15	0	25	40	0	0	0	25	0	0	0	0	15	15	0	0	0	120	20	0	0.648649	0.142857	100	185	140
7	1	18	1	0	0	1	0	0	0	0	0	0	0	0	15	0	0	0	0	0	0	0	0	0	0	0	0	15	0	0	0	15	15	0	0.0810811	0.107143	100	185	140
8	1	18	1	0	0	1	0	0	0	0	0	0	0	0	0	0	0	0	0	0	0	0	0	35	0	0	0	15	0	40	75	0	15	0.75	0	0.107143	100	185	140
9	1	19	1	0	0	1	0	0	15	0	0	0	0	0	0	0	0	0	0	0	0	0	0	0	0	0	0	15	0	0	0	0	30	0	0	0.214286	100	185	140
10	1	19	1	0	0	1	0	0	15	0	0	30	0	0	0	0	0	40	0	0	5	25	0	35	0	0	15	0	0	0	35	110	20	0.35	0.594595	0.142857	100	185	140
11	1	18	1	0	0	1	0	0	0	0	0	0	0	0	0	0	0	40	0	0	0	0	0	0	0	0	0	0	0	0	0	40	0	0	0.216216	0	100	185	140
12	1	18	1	0	0	1	0	0	15	0	0	30	0	0	0	0	25	40	0	0	0	25	0	35	0	0	15	0	0	40	75	135	15	0.75	0.72973	0.107143	100	185	140
13	1	18	1	0	0	1	20	0	0	0	0	0	0	0	0	0	25	40	0	0	0	0	0	0	0	0	15	0	0	0	0	80	20	0	0.432432	0.142857	100	185	140
14	1	18	1	0	0	1	0	30	0	15	0	30	30	0	0	0	0	0	0	0	0	0	0	0	0	0	0	0	0	0	15	30	60	0.15	0.162162	0.428571	100	185	140
15	1	18	1	0	0	1	0	0	0	0	0	0	30	0	15	0	0	0	0	0	0	25	0	0	0	0	15	0	0	40	40	55	30	0.4	0.297297	0.214286	100	185	140
16	1	19	1	0	0	1	0	0	0	0	0	0	0	0	0	0	25	40	0	0	0	25	0	0	0	0	0	15	0	0	0	90	15	0	0.486486	0.107143	100	185	140
17	1	18	1	0	0	1	0	0	15	0	0	0	30	0	0	0	0	40	0	0	0	0	0	0	0	0	0	0	0	0	0	40	45	0	0.216216	0.321429	100	185	140
18	1	18	1	0	0	1	0	0	15	15	0	0	0	0	0	0	25	40	0	0	5	25	0	0	0	10	0	0	0	0	15	90	30	0.15	0.486486	0.214286	100	185	140
19	1	19	1	0	0	1	0	0	0	0	0	0	0	0	0	0	0	40	0	0	0	25	0	0	0	0	15	0	0	0	0	80	0	0	0.432432	0	100	185	140
20	1	18	1	0	0	1	0	0	15	0	0	0	0	0	0	5	0	0	0	0	0	25	0	35	0	0	0	15	0	40	75	25	35	0.75	0.135135	0.25	100	185	140
21	0	18	1	0	0	1	0	0	15	0	0	30	0	0	0	0	25	40	0	0	0	0	0	35	0	0	0	0	0	40	75	95	15	0.75	0.513514	0.107143	100	185	140
22	1	19	1	0	0	1	0	0	15	0	0	0	0	0	0	0	0	0	0	0	0	0	0	0	0	10	0	0	10	0	10	0	25	0.1	0	0.178571	100	185	140
23	0	18	1	0	0	1	0	0	0	15	0	0	0	0	0	0	0	40	0	0	0	25	0	35	0	0	0	0	0	40	90	65	0	0.9	0.351351	0	100	185	140
24	0	18	1	0	0	1	0	0	0	0	0	0	0	0	0	0	0	0	0	0	0	25	0	0	0	0	0	0	0	0	0	25	0	0	0.135135	0	100	185	140
25	0	18	1	0	0	1	0	0	15	0	0	0	0	0	0	0	0	0	0	0	0	0	0	0	0	0	15	0	0	40	40	15	15	0.4	0.0810811	0.107143	100	185	140
26	1	19	1	0	0	1	20	0	0	0	0	0	30	0	0	0	0	0	0	0	0	0	0	0	0	0	0	0	0	0	0	0	50	0	0	0.357143	100	185	140
27	0	19	1	0	0	1	0	0	0	0	0	0	0	0	0	0	0	0	0	0	0	25	0	0	0	0	0	0	0	0	0	25	0	0	0.135135	0	100	185	140
28	0	22	1	0	0	1	0	0	0	0	0	0	0	0	15	0	0	40	0	0	5	25	10	35	0	0	0	0	0	40	75	90	5	0.75	0.486486	0.0357143	100	185	140
29	0	18	1	0	0	1	0	0	15	0	0	0	0	0	0	0	0	0	0	0	0	0	0	0	0	0	0	0	0	0	0	0	15	0	0	0.107143	100	185	140
30	1	18	1	0	0	1	20	0	0	0	0	30	0	0	15	0	0	0	0	0	0	25	0	0	0	0	0	15	0	0	0	70	35	0	0.378378	0.25	100	185	140
31	0	19	1	0	0	1	0	0	15	0	0	0	0	0	0	0	0	0	0	0	0	25	0	0	0	0	0	0	0	0	0	25	15	0	0.135135	0.107143	100	185	140
32	0	19	1	0	0	1	0	0	15	0	0	0	0	0	0	0	0	0	0	0	0	25	10	35	0	0	0	15	0	40	75	35	30	0.75	0.189189	0.214286	100	185	140
33	0	18	1	0	0	1	0	0	15	0	0	0	0	0	0	0	0	0	0	0	0	25	0	0	0	0	0	0	0	0	0	25	15	0	0.135135	0.107143	100	185	140
34	0	18	1	0	0	1	0	0	0	0	0	30	0	0	15	0	0	40	0	0	0	0	10	0	0	0	0	0	0	0	0	95	0	0	0.513514	0	100	185	140
35	0	18	1	0	0	1	0	0	0	0	0	0	0	0	0	0	0	40	0	0	0	0	0	0	0	0	0	0	0	0	0	40	0	0	0.216216	0	100	185	140
36	0	18	1	0	0	1	0	0	15	0	0	30	0	0	15	0	0	40	0	0	0	0	10	0	0	0	15	0	0	0	0	110	15	0	0.594595	0.107143	100	185	140
37	0	18	1	0	0	1	0	0	15	0	0	0	0	0	15	0	0	40	0	0	0	25	0	0	0	0	0	0	0	0	0	80	15	0	0.432432	0.107143	100	185	140
38	0	18	1	0	0	1	0	0	0	0	0	30	0	0	15	0	0	40	0	0	0	0	10	0	0	0	15	0	0	0	0	110	0	0	0.594595	0	100	185	140
39	0	18	1	0	0	1	0	0	0	0	0	0	0	0	15	0	25	0	0	5	0	0	0	0	0	0	0	0	0	0	0	40	5	0	0.216216	0.0357143	100	185	140
40	0	19	1	0	0	1	0	0	0	0	5	0	0	15	0	0	0	0	0	0	0	25	0	35	0	0	0	0	0	0	35	40	5	0.35	0.216216	0.0357143	100	185	140
41	0	23	2	1	1	1	20	0	0	0	5	30	30	0	15	0	25	40	0	0	0	25	0	0	0	0	0	0	0	40	40	135	55	0.4	0.72973	0.392857	100	185	140
42	0	24	2	1	1	1	20	0	0	0	0	0	0	0	0	0	0	0	0	0	0	25	0	35	0	0	0	0	10	0	45	25	20	0.45	0.135135	0.142857	100	185	140
43	0	33	2	1	1	1	20	0	15	0	0	30	0	0	0	0	0	0	0	5	0	25	0	35	0	0	15	0	0	40	75	70	40	0.75	0.378378	0.285714	100	185	140
44	0	26	2	1	1	1	20	30	0	0	0	30	0	0	15	5	0	40	5	0	0	0	0	35	0	0	15	0	10	0	45	105	55	0.45	0.567568	0.392857	100	185	140
45	0	27	2	1	1	1	0	0	0	0	0	0	0	0	15	0	25	40	0	0	0	0	0	35	0	0	0	0	0	0	35	80	0	0.35	0.432432	0	100	185	140
46	1	22	3	1	1	1	20	0	15	0	0	0	30	0	0	0	0	0	0	0	0	0	0	0	0	0	0	0	0	40	40	0	65	0.4	0	0.464286	100	185	140
47	1	23	3	1	1	1	0	30	0	0	5	30	30	0	15	0	0	40	0	5	0	25	0	0	0	0	15	0	0	0	0	125	70	0	0.675676	0.5	100	185	140
48	1	23	3	1	1	1	20	0	15	0	0	30	30	0	15	0	0	40	0	0	0	25	0	0	0	10	0	0	10	0	10	110	75	0.1	0.594595	0.535714	100	185	140
49	0	33	3	1	1	1	0	30	0	0	0	30	0	15	0	5	25	0	0	0	0	25	0	0	0	0	15	0	0	40	40	110	35	0.4	0.594595	0.25	100	185	140
50	0	23	3	1	2	2	20	0	15	0	0	0	30	15	0	0	0	0	0	5	0	0	0	35	0	0	15	15	0	40	75	30	85	0.75	0.162162	0.607143	100	185	140
51	1	41	3	1	2	2	20	0	15	0	0	30	30	0	0	0	25	40	0	0	0	25	0	0	0	0	0	0	0	0	0	120	65	0	0.648649	0.464286	100	185	140
52	1	24	3	1	2	2	20	0	0	0	0	0	30	15	0	0	0	40	0	0	0	25	10	0	0	0	15	0	0	0	0	105	50	0	0.567568	0.357143	100	185	140
53	1	25	3	1	2	2	20	0	0	0	5	30	30	15	0	0	25	40	0	0	0	25	10	35	0	0	15	15	10	40	85	160	70	0.85	0.864865	0.5	100	185	140
54	0	29	3	1	2	2	20	0	15	0	0	30	30	0	15	0	0	40	0	0	0	0	0	0	0	0	0	15	0	0	0	85	80	0	0.459459	0.571429	100	185	140
55	1	28	3	1	2	2	20	0	0	0	0	0	0	15	0	0	0	40	0	0	0	25	0	0	0	0	15	0	0	40	40	95	20	0.4	0.513514	0.142857	100	185	140
56	0	24	2	1	2	2	20	30	0	0	0	0	0	0	15	0	25	40	0	0	0	25	0	0	0	0	15	0	0	40	40	120	50	0.4	0.648649	0.357143	100	185	140
57	1	24	3	1	2	2	20	0	0	0	5	30	30	0	15	0	25	40	0	0	0	25	0	35	0	0	0	0	0	0	35	135	55	0.35	0.72973	0.392857	100	185	140
58	0	22	3	1	2	2	20	0	0	0	0	0	30	0	15	5	0	40	0	0	0	0	0	0	0	0	0	0	0	40	40	55	55	0.4	0.297297	0.392857	100	185	140
59	1	25	3	1	2	2	20	30	0	0	0	0	30	15	0	0	25	40	0	5	5	25	10	0	0	0	0	0	0	0	0	115	90	0	0.621622	0.642857	100	185	140
60	1	23	3	1	2	2	0	0	15	0	0	0	30	15	0	0	25	40	0	0	0	0	0	35	0	0	15	0	0	40	75	95	45	0.75	0.513514	0.321429	100	185	140
61	1	23	3	1	2	2	0	0	0	0	0	30	30	0	15	0	0	0	0	0	0	25	0	0	0	0	0	0	10	0	10	70	30	0.1	0.378378	0.214286	100	185	140
62	1	24	3	1	2	2	0	0	0	0	0	30	30	0	15	0	25	0	0	5	0	25	10	35	0	0	0	0	0	40	75	105	35	0.75	0.567568	0.25	100	185	140
63	0	23	3	1	3	3	0	0	0	0	5	30	30	15	0	0	0	0	0	5	0	0	10	0	0	10	0	0	0	0	0	55	50	0	0.297297	0.357143	100	185	140
64	0	26	2	1	3	3	20	0	0	0	0	30	30	0	15	0	25	40	0	0	0	25	0	0	0	0	0	0	0	40	40	135	50	0.4	0.72973	0.357143	100	185	140
65	0	34	3	1	3	3	0	30	0	0	0	0	30	0	0	0	0	0	5	5	0	0	0	35	0	0	0	15	0	40	75	5	80	0.75	0.027027	0.571429	100	185	140
66	0	27	2	1	3	3	0	0	0	15	0	0	30	0	0	0	25	0	0	5	0	25	0	35	0	0	15	0	0	0	50	65	35	0.5	0.351351	0.25	100	185	140
67	1	23	3	1	3	3	20	0	0	0	5	30	30	15	0	0	25	0	0	5	0	25	0	0	0	0	15	0	0	0	0	110	60	0	0.594595	0.428571	100	185	140
68	0	23	3	1	3	3	0	0	15	0	0	0	0	0	15	5	0	0	0	0	0	0	0	0	0	0	15	0	0	0	0	30	20	0	0.162162	0.142857	100	185	140
69	1	24	3	1	3	3	20	0	15	0	0	30	0	0	15	5	0	0	0	5	0	25	0	0	0	0	15	0	0	0	0	85	45	0	0.459459	0.321429	100	185	140
70	1	28	3	1	4	4	20	0	0	15	0	30	0	15	0	0	25	40	0	0	0	25	0	0	0	0	15	0	0	40	55	150	20	0.55	0.810811	0.142857	100	185	140
71	0	24	3	1	4	4	0	30	0	15	0	0	30	15	0	0	0	40	0	0	0	25	0	0	0	0	15	0	0	0	15	95	60	0.15	0.513514	0.428571	100	185	140
72	0	28	2	1	3	3	20	0	0	0	5	0	30	15	0	0	25	0	0	5	0	25	0	0	0	0	15	0	0	0	0	80	60	0	0.432432	0.428571	100	185	140
73	0	21	1	0	0	4	20	0	0	0	0	0	30	0	0	0	0	40	0	0	0	25	0	0	0	0	15	0	0	0	0	80	50	0	0.432432	0.357143	100	185	140
74	1	21	1	0	0	4	20	30	0	0	0	0	30	0	0	0	0	0	0	5	0	25	0	0	0	10	0	0	0	0	0	25	95	0	0.135135	0.678571	100	185	140
75	0	22	1	0	0	4	20	0	0	0	0	0	0	0	15	0	0	40	0	0	0	25	0	0	0	0	0	0	0	0	0	80	20	0	0.432432	0.142857	100	185	140
76	1	22	1	0	0	4	20	30	15	0	0	0	30	15	0	0	0	40	0	0	0	0	0	0	0	0	15	0	0	0	0	70	95	0	0.378378	0.678571	100	185	140
77	0	21	1	0	0	4	20	0	15	0	0	0	30	15	0	0	0	0	0	0	0	25	10	0	0	0	15	0	0	0	0	65	65	0	0.351351	0.464286	100	185	140
78	0	21	1	0	0	4	20	0	15	0	0	0	0	0	0	0	0	40	0	0	0	25	0	35	0	0	15	0	0	0	35	80	35	0.35	0.432432	0.25	100	185	140
79	0	22	1	0	0	4	20	0	15	0	0	30	30	0	15	0	0	40	0	0	5	25	0	0	0	0	0	0	0	0	0	110	70	0	0.594595	0.5	100	185	140
80	1	21	1	0	0	4	20	0	0	0	0	0	30	15	0	0	25	0	0	0	0	0	0	0	0	0	15	0	10	0	10	55	50	0.1	0.297297	0.357143	100	185	140
81	0	24	1	0	0	4	20	30	0	0	0	0	30	0	0	0	0	40	0	0	0	25	0	35	0	0	0	0	10	0	45	65	80	0.45	0.351351	0.571429	100	185	140
82	0	22	1	0	0	4	0	0	0	0	0	0	30	0	0	0	0	40	0	0	0	0	0	0	0	0	0	0	10	0	10	40	30	0.1	0.216216	0.214286	100	185	140
83	1	22	1	0	0	4	20	0	0	0	0	0	30	0	0	0	0	40	0	0	0	25	0	35	0	0	0	15	0	40	75	65	65	0.75	0.351351	0.464286	100	185	140
84	0	22	1	0	0	4	20	0	15	0	0	0	30	0	15	0	0	0	0	0	5	0	0	35	0	0	0	0	0	40	75	15	70	0.75	0.0810811	0.5	100	185	140
85	0	21	1	0	0	4	20	30	0	0	0	0	0	0	15	0	0	40	0	0	0	25	0	35	0	0	0	0	0	40	75	80	50	0.75	0.432432	0.357143	100	185	140
86	1	21	1	0	0	4	20	30	0	0	0	0	0	15	0	0	0	40	0	0	0	25	0	0	0	0	0	0	0	40	40	80	50	0.4	0.432432	0.357143	100	185	140
87	1	22	1	0	0	4	20	0	0	0	5	30	0	0	0	0	0	0	0	0	0	25	0	0	0	0	15	0	0	0	0	70	25	0	0.378378	0.178571	100	185	140
88	1	22	1	0	0	4	20	0	15	0	0	0	30	0	0	0	0	0	0	0	0	25	0	35	0	10	15	0	10	0	45	40	75	0.45	0.216216	0.535714	100	185	140
89	1	22	1	0	0	4	20	0	0	0	0	0	0	0	0	0	0	40	0	0	0	25	0	0	0	0	0	0	0	0	0	65	20	0	0.351351	0.142857	100	185	140
90	1	22	1	0	0	4	20	0	15	0	0	30	30	0	0	0	0	40	0	0	0	25	0	0	0	0	15	15	0	0	0	110	80	0	0.594595	0.571429	100	185	140
91	1	21	1	0	0	4	20	0	15	15	5	30	30	0	15	0	0	0	0	0	0	25	0	0	0	0	0	0	0	0	15	70	70	0.15	0.378378	0.5	100	185	140
92	0	21	1	0	0	4	20	30	0	0	0	0	30	0	0	0	0	40	0	0	0	25	0	35	0	0	15	15	10	0	45	80	95	0.45	0.432432	0.678571	100	185	140
93	1	22	1	0	0	4	0	0	15	0	0	30	0	0	0	0	0	40	0	0	0	25	0	0	0	0	0	0	0	0	0	95	15	0	0.513514	0.107143	100	185	140
94	0	21	1	0	0	4	20	0	15	0	0	30	30	0	15	0	0	40	0	0	0	0	0	35	0	0	0	0	0	40	75	85	65	0.75	0.459459	0.464286	100	185	140
95	0	22	1	0	0	4	20	0	15	0	0	0	0	0	15	5	25	40	0	0	0	0	0	0	0	0	15	0	0	0	0	95	40	0	0.513514	0.285714	100	185	140
96	1	21	1	0	0	4	20	0	0	0	0	0	30	0	15	0	0	0	0	0	0	25	0	0	0	0	0	0	0	40	40	40	50	0.4	0.216216	0.357143	100	185	140
97	1	22	1	0	0	4	20	30	0	0	0	0	0	15	0	0	0	40	0	0	0	25	0	35	0	0	0	0	0	0	35	80	50	0.35	0.432432	0.357143	100	185	140
98	0	21	1	0	0	4	20	0	15	0	0	0	30	0	0	0	0	40	0	0	0	0	0	0	0	0	0	0	0	0	0	40	65	0	0.216216	0.464286	100	185	140
99	1	26	1	0	0	4	20	0	15	0	0	0	30	15	0	0	25	0	0	5	0	0	0	0	0	0	0	0	10	0	10	40	70	0.1	0.216216	0.5	100	185	140
100	1	22	1	0	0	4	0	0	0	0	0	30	0	0	0	5	25	0	0	5	0	25	0	0	0	10	0	0	0	0	0	80	20	0	0.432432	0.142857	100	185	140
101	1	22	1	0	0	4	20	0	0	0	0	0	30	0	0	0	0	0	0	5	0	0	0	0	0	0	15	0	0	0	0	15	55	0	0.0810811	0.392857	100	185	140
102	0	23	1	0	0	4	20	0	0	0	0	0	0	0	15	0	25	0	0	0	5	25	0	35	0	0	0	0	0	40	75	65	25	0.75	0.351351	0.178571	100	185	140
103	0	22	1	0	0	4	20	0	0	0	0	0	30	0	0	0	0	0	0	5	0	25	10	0	0	0	15	15	0	0	0	50	70	0	0.27027	0.5	100	185	140
104	1	22	1	0	0	4	0	0	15	0	0	0	0	0	0	5	0	0	0	5	0	25	0	0	0	0	0	0	0	0	0	25	25	0	0.135135	0.178571	100	185	140
105	1	22	1	0	0	4	20	0	15	0	0	0	30	0	0	0	0	40	0	5	0	0	0	35	0	0	15	15	10	0	45	55	85	0.45	0.297297	0.607143	100	185	140
106	0	22	1	0	0	4	0	0	15	0	0	0	30	0	0	0	0	0	0	5	0	0	0	35	0	0	0	0	0	40	75	0	50	0.75	0	0.357143	100	185	140
107	1	28	3	1	6	6	20	0	0	0	5	0	0	0	15	5	25	0	0	0	5	25	0	35	0	0	15	15	0	0	35	80	50	0.35	0.432432	0.357143	100	185	140
108	1	27	2	1	6	6	20	0	15	0	0	30	30	0	15	0	25	0	0	0	0	25	0	35	0	0	0	0	0	40	75	95	65	0.75	0.513514	0.464286	100	185	140
109	0	27	3	1	6	6	20	30	0	0	0	30	30	15	0	0	25	40	0	0	0	25	0	0	0	0	0	15	10	40	50	135	95	0.5	0.72973	0.678571	100	185	140
110	1	28	3	1	6	6	20	0	0	0	5	30	30	15	0	0	25	40	0	0	0	0	0	35	0	0	15	0	0	40	75	125	55	0.75	0.675676	0.392857	100	185	140
111	1	27	2	1	6	6	0	30	0	15	0	30	30	15	0	0	25	40	0	0	0	25	0	35	0	0	15	0	0	40	90	150	60	0.9	0.810811	0.428571	100	185	140
112	0	28	3	1	6	6	20	30	0	0	0	0	30	15	0	0	25	40	0	5	0	25	10	35	0	0	15	0	0	40	75	130	85	0.75	0.702703	0.607143	100	185	140
113	0	28	2	1	6	6	0	0	15	0	0	30	30	15	0	0	0	40	0	5	0	25	10	0	0	0	0	0	0	40	40	120	50	0.4	0.648649	0.357143	100	185	140
114	0	28	2	1	6	6	20	0	0	0	5	30	30	0	15	0	25	40	0	0	0	25	10	35	0	0	15	0	0	40	75	160	55	0.75	0.864865	0.392857	100	185	140
115	0	39	3	1	6	6	20	0	0	0	5	0	30	0	15	0	25	0	0	5	0	25	0	35	0	0	0	0	0	40	75	65	60	0.75	0.351351	0.428571	100	185	140
116	0	28	2	1	6	6	0	30	0	0	0	30	30	15	0	0	25	40	0	0	0	0	0	35	0	0	15	0	0	40	75	125	60	0.75	0.675676	0.428571	100	185	140
117	1	35	3	1	6	6	20	0	15	0	0	30	30	0	0	0	0	40	0	0	0	25	0	0	0	10	0	0	0	0	0	95	75	0	0.513514	0.535714	100	185	140
118	0	28	2	1	6	6	20	30	0	0	0	0	30	15	0	0	25	0	0	0	0	25	0	0	5	10	0	0	0	0	0	70	90	0	0.378378	0.642857	100	185	140
119	1	27	2	1	6	6	0	0	0	0	0	0	30	15	0	0	0	40	0	0	0	25	0	35	0	0	0	0	0	0	35	80	30	0.35	0.432432	0.214286	100	185	140
120	1	37	2	1	6	6	20	0	0	0	5	30	30	15	0	0	25	40	0	0	0	25	0	0	0	0	0	15	0	40	40	135	70	0.4	0.72973	0.5	100	185	140
121	0	29	2	1	7	7	20	30	0	15	0	0	30	15	0	0	25	0	0	5	0	25	0	35	0	0	15	0	0	40	90	80	85	0.9	0.432432	0.607143	100	185	140
122	1	34	2	1	7	7	20	30	0	0	0	0	0	15	0	0	25	40	0	0	0	25	10	0	0	0	0	0	0	40	40	115	50	0.4	0.621622	0.357143	100	185	140
123	1	34	2	1	7	7	0	30	0	0	0	30	30	15	0	0	25	40	0	0	0	25	0	35	0	10	0	15	10	0	45	135	85	0.45	0.72973	0.607143	100	185	140
124	0	32	3	1	7	7	0	0	15	0	0	0	30	15	0	0	0	40	0	0	0	25	0	0	0	0	0	15	0	0	0	80	60	0	0.432432	0.428571	100	185	140
125	1	38	3	1	7	7	20	0	15	0	0	0	30	0	0	0	0	0	0	0	0	25	0	0	0	0	15	15	0	0	0	40	80	0	0.216216	0.571429	100	185	140
126	0	39	2	1	7	7	20	0	0	0	5	30	30	0	15	0	25	40	0	0	0	0	0	35	0	0	0	15	0	40	75	110	70	0.75	0.594595	0.5	100	185	140
127	0	28	2	1	7	7	20	30	0	0	0	0	0	15	0	0	25	40	0	0	0	25	10	35	0	0	0	0	0	40	75	115	50	0.75	0.621622	0.357143	100	185	140
128	1	29	2	1	7	7	20	0	0	0	0	30	0	0	15	0	0	0	0	5	5	25	0	0	0	0	0	15	0	40	40	70	45	0.4	0.378378	0.321429	100	185	140
129	1	30	3	1	7	7	20	0	0	0	0	30	30	0	15	0	0	40	0	0	0	25	0	0	0	0	15	0	0	40	40	125	50	0.4	0.675676	0.357143	100	185	140
130	0	32	3	1	7	7	20	0	0	0	0	30	30	15	0	0	0	40	0	0	0	0	0	0	0	0	15	0	0	40	40	100	50	0.4	0.540541	0.357143	100	185	140
131	0	31	3	1	7	7	20	0	0	0	0	30	30	15	0	0	0	40	0	0	5	0	0	35	0	0	15	0	0	40	75	100	55	0.75	0.540541	0.392857	100	185	140
132	0	29	3	1	8	8	20	30	0	0	0	30	0	0	0	0	25	40	0	0	0	25	10	35	0	0	15	0	0	40	75	145	50	0.75	0.783784	0.357143	100	185	140
133	0	30	3	1	8	8	0	30	0	0	0	0	30	15	0	0	25	40	0	0	0	0	0	35	0	0	0	0	0	40	75	80	60	0.75	0.432432	0.428571	100	185	140
134	1	31	3	1	8	8	20	30	0	0	0	30	30	15	0	0	0	0	0	5	0	25	0	35	0	0	15	15	0	40	75	85	100	0.75	0.459459	0.714286	100	185	140
135	1	29	3	1	8	8	0	30	15	0	0	0	30	0	15	0	0	40	5	0	0	0	0	35	0	0	15	0	0	40	75	75	75	0.75	0.405405	0.535714	100	185	140
136	0	34	2	1	8	8	20	0	15	0	0	0	30	15	0	0	25	40	0	0	0	0	0	35	0	10	0	0	0	40	75	80	75	0.75	0.432432	0.535714	100	185	140
137	0	45	3	1	8	8	20	0	15	0	5	30	30	15	15	0	25	40	0	0	0	25	0	0	0	0	0	0	0	0	0	150	70	0	0.810811	0.5	100	185	140
138	0	29	2	1	8	8	20	0	15	0	0	0	30	0	15	0	25	40	0	0	5	25	0	35	0	0	15	0	0	0	35	120	70	0.35	0.648649	0.5	100	185	140
139	1	28	2	1	8	8	0	30	0	15	0	0	30	0	0	0	0	40	0	0	0	25	10	35	0	0	0	15	0	40	90	75	75	0.9	0.405405	0.535714	100	185	140
140	0	37	3	1	8	8	0	0	15	0	0	30	30	15	0	0	0	40	5	0	0	25	0	0	0	10	0	0	0	0	0	115	55	0	0.621622	0.392857	100	185	140
141	1	38	2	1	8	8	0	30	0	0	0	0	30	0	0	5	0	0	0	5	0	25	0	0	0	10	15	15	0	0	0	40	95	0	0.216216	0.678571	100	185	140
142	1	31	2	1	9	9	0	0	0	0	0	30	30	15	0	0	25	40	0	0	0	25	0	35	0	0	15	15	10	0	45	150	45	0.45	0.810811	0.321429	100	185	140
143	1	29	3	1	9	9	20	0	15	0	5	30	30	0	0	0	25	40	0	0	0	0	10	35	0	10	0	0	0	40	75	105	80	0.75	0.567568	0.571429	100	185	140
144	0	32	3	1	9	9	0	0	0	0	5	0	30	0	15	0	25	40	0	0	0	25	0	35	0	0	0	0	0	40	75	105	35	0.75	0.567568	0.25	100	185	140
145	0	34	3	1	9	9	0	0	0	0	5	30	30	15	0	0	0	0	0	5	5	25	0	0	0	0	0	0	0	40	40	70	45	0.4	0.378378	0.321429	100	185	140
146	1	30	3	1	9	9	0	0	0	0	5	30	30	15	0	0	25	40	0	5	0	25	0	0	0	10	0	0	0	0	0	135	50	0	0.72973	0.357143	100	185	140
147	1	38	3	1	10	10	0	0	0	0	0	30	30	15	15	0	25	0	0	5	0	25	10	35	0	0	0	0	0	40	75	120	35	0.75	0.648649	0.25	100	185	140
148	0	31	3	1	10	10	0	0	15	0	0	0	30	15	0	0	25	40	0	0	0	25	0	35	0	0	0	0	0	40	75	105	45	0.75	0.567568	0.321429	100	185	140
149	0	32	3	1	10	10	20	0	15	0	0	30	30	15	0	0	25	40	0	0	0	0	10	0	0	0	15	0	0	0	0	135	65	0	0.72973	0.464286	100	185	140
150	0	32	2	1	10	10	0	0	0	0	0	0	30	15	0	0	25	40	0	0	0	25	0	0	0	0	0	0	0	40	40	105	30	0.4	0.567568	0.214286	100	185	140
151	1	31	3	1	10	10	20	30	0	0	0	30	30	0	15	0	25	40	0	0	0	0	0	0	0	0	0	0	0	0	0	110	80	0	0.594595	0.571429	100	185	140
152	1	32	3	1	10	10	20	0	0	0	5	30	30	15	0	0	25	40	0	0	0	25	0	35	0	0	0	0	0	40	75	135	55	0.75	0.72973	0.392857	100	185	140
153	1	32	3	1	10	10	20	30	15	0	0	30	30	15	0	0	25	40	0	0	0	25	0	0	0	0	15	0	0	0	0	150	95	0	0.810811	0.678571	100	185	140
154	0	30	3	1	10	10	0	0	0	0	0	0	30	15	0	0	0	0	0	5	0	0	0	35	0	0	0	0	0	40	75	15	35	0.75	0.0810811	0.25	100	185	140
155	0	32	3	1	10	10	0	0	15	0	0	30	30	15	0	0	0	0	0	5	0	25	0	35	0	0	0	0	0	0	35	70	50	0.35	0.378378	0.357143	100	185	140
156	0	32	3	1	10	10	20	30	0	0	0	30	30	15	0	0	25	40	0	0	0	25	0	35	0	0	15	0	0	40	75	150	80	0.75	0.810811	0.571429	100	185	140
157	0	33	3	1	10	10	20	0	0	0	0	0	30	15	0	0	25	0	0	5	0	25	0	35	0	0	0	15	0	40	75	65	70	0.75	0.351351	0.5	100	185	140
158	0	31	2	1	11	11	20	0	15	0	0	30	30	15	0	0	25	40	0	0	5	25	0	0	5	10	0	15	0	40	40	140	95	0.4	0.756757	0.678571	100	185	140
159	0	33	2	1	11	11	0	0	0	0	0	0	30	15	0	0	25	40	0	0	0	0	0	35	0	10	0	0	0	0	35	80	40	0.35	0.432432	0.285714	100	185	140
160	0	45	2	1	12	12	0	0	15	0	0	0	0	15	0	0	25	0	0	5	0	25	0	0	0	0	0	0	0	40	40	65	20	0.4	0.351351	0.142857	100	185	140
161	1	40	3	1	12	12	20	30	0	0	0	0	30	15	0	0	25	0	0	5	0	25	0	0	0	0	15	0	0	40	40	80	85	0.4	0.432432	0.607143	100	185	140
162	1	34	3	1	13	13	0	0	0	0	0	30	30	15	15	0	0	40	0	0	0	25	10	0	0	10	0	0	0	0	0	135	40	0	0.72973	0.285714	100	185	140
163	1	35	3	1	14	14	20	30	0	0	0	30	30	0	15	0	25	40	0	0	0	25	0	35	0	0	15	0	0	40	75	150	80	0.75	0.810811	0.571429	100	185	140
164	0	36	2	1	15	15	20	0	0	0	5	0	30	15	0	0	0	0	0	5	0	25	10	35	0	0	0	0	0	40	75	50	60	0.75	0.27027	0.428571	100	185	140
165	1	45	3	1	15	15	20	0	0	0	0	0	30	15	15	0	0	40	5	0	0	0	0	0	0	0	15	0	0	40	40	90	50	0.4	0.486486	0.357143	100	185	140
166	1	37	3	1	15	15	20	30	15	0	0	30	30	0	15	0	25	40	0	0	0	25	0	35	0	0	15	0	0	40	75	150	95	0.75	0.810811	0.678571	100	185	140
167	1	37	3	1	15	15	20	0	15	0	0	0	30	15	0	0	0	0	0	5	0	0	0	0	0	0	15	0	0	0	0	30	70	0	0.162162	0.5	100	185	140
168	0	38	2	1	16	16	0	30	0	0	0	30	30	15	0	0	25	0	0	5	0	25	0	0	0	0	15	0	10	40	50	110	65	0.5	0.594595	0.464286	100	185	140
169	0	38	2	1	18	18	20	0	15	0	0	0	30	0	0	0	25	40	0	0	0	25	0	35	0	0	0	15	0	40	75	90	80	0.75	0.486486	0.571429	100	185	140
170	1	39	3	1	19	19	20	30	0	15	0	30	30	0	15	0	0	40	0	0	0	0	0	0	5	10	15	0	0	0	15	105	90	0.15	0.567568	0.642857	100	185	140
171	1	41	3	1	20	20	20	0	15	0	0	30	30	0	15	0	25	0	0	5	0	25	0	35	0	0	0	15	10	40	85	95	85	0.85	0.513514	0.607143	100	185	140
172	1	41	3	1	21	21	0	0	15	0	0	0	30	15	0	5	0	40	0	0	0	25	10	0	0	0	15	15	10	40	50	105	65	0.5	0.567568	0.464286	100	185	140
173	0	42	3	1	21	21	0	30	0	0	0	0	30	15	0	0	0	40	0	0	0	0	0	0	0	0	15	0	0	0	0	70	60	0	0.378378	0.428571	100	185	140
174	1	45	3	1	22	22	20	30	0	0	0	0	30	0	0	0	0	40	5	0	0	25	0	35	0	0	0	15	0	40	75	70	95	0.75	0.378378	0.678571	100	185	140
175	1	51	3	1	31	31	20	0	0	15	0	0	30	0	15	0	25	40	0	0	0	25	0	35	0	0	15	0	0	0	50	120	50	0.5	0.648649	0.357143	100	185	140
176	1	32	2	1	6	6	0	0	0	0	0	30	30	0	0	0	0	40	0	0	0	25	10	0	0	10	0	0	0	40	40	105	40	0.4	0.567568	0.285714	100	185	140
177	0	26	2	1	5	5	20	30	0	0	0	30	30	0	15	0	0	40	0	0	0	25	0	35	0	0	0	0	0	40	75	110	80	0.75	0.594595	0.571429	100	185	140
178	0	28	3	1	5	5	20	0	15	0	0	30	0	15	0	0	0	40	0	0	5	25	0	35	0	10	15	15	0	40	75	125	65	0.75	0.675676	0.464286	100	185	140
179	0	26	3	1	5	5	20	0	15	0	0	0	30	0	15	0	25	40	0	0	0	0	0	0	0	0	15	15	0	40	40	95	80	0.4	0.513514	0.571429	100	185	140
180	0	26	3	1	5	5	20	30	0	0	0	30	30	15	0	0	25	40	0	0	0	0	0	0	0	0	15	0	0	0	0	125	80	0	0.675676	0.571429	100	185	140
181	1	31	3	1	4	4	0	30	0	0	0	30	30	0	15	0	25	40	0	0	0	25	10	35	0	10	0	0	0	40	75	145	70	0.75	0.783784	0.5	100	185	140
182	0	26	3	1	5	5	20	30	0	0	0	30	30	0	0	0	25	40	5	0	0	0	0	35	0	0	15	0	0	40	75	115	80	0.75	0.621622	0.571429	100	185	140
183	0	47	2	1	6	6	0	30	0	0	0	0	30	0	15	0	0	0	0	5	5	0	0	35	0	0	0	15	0	40	75	15	85	0.75	0.0810811	0.607143	100	185	140
184	0	45	3	1	16	16	0	0	15	0	0	0	0	0	15	0	25	0	0	5	5	0	0	0	0	0	0	15	0	0	0	40	40	0	0.216216	0.285714	100	185	140
185	1	36	3	1	12	12	0	30	15	0	0	0	30	0	0	0	0	40	0	0	0	25	0	0	0	0	15	15	0	0	0	80	90	0	0.432432	0.642857	100	185	140
186	0	42	3	1	11	11	0	30	15	0	0	30	30	15	0	0	25	40	0	0	0	0	10	35	0	0	0	15	0	40	75	120	90	0.75	0.648649	0.642857	100	185	140
187	0	49	3	1	28	28	0	0	15	0	0	30	30	0	15	0	0	0	0	5	0	25	0	35	0	0	0	0	0	40	75	70	50	0.75	0.378378	0.357143	100	185	140
188	1	44	3	1	19	19	0	30	0	0	0	0	0	0	0	0	0	0	0	0	5	0	0	35	0	0	0	0	10	40	85	0	35	0.85	0	0.25	100	185	140
189	0	38	3	1	12	12	0	0	0	0	0	30	0	0	15	0	0	40	0	0	0	0	0	35	0	0	0	0	0	40	75	85	0	0.75	0.459459	0	100	185	140
190	0	48	2	1	22	22	20	0	15	0	0	0	30	15	0	0	25	0	0	0	0	25	0	0	0	0	15	0	0	40	40	80	65	0.4	0.432432	0.464286	100	185	140
191	1	23	2	1	1	1	20	0	15	0	0	0	0	15	0	0	25	0	0	0	0	25	0	35	0	0	0	15	0	0	35	65	50	0.35	0.351351	0.357143	100	185	140
192	1	23	2	1	1	1	20	0	15	0	0	0	30	15	0	0	0	40	0	0	0	25	0	35	0	0	15	0	0	0	35	95	65	0.35	0.513514	0.464286	100	185	140
193	0	23	3	1	1	1	20	0	15	0	0	30	30	0	0	0	25	40	0	0	0	25	0	35	0	0	15	0	0	40	75	135	65	0.75	0.72973	0.464286	100	185	140
194	1	25	3	1	4	4	20	0	15	0	0	30	30	0	15	0	0	40	0	0	0	0	0	35	0	10	0	0	10	0	45	85	75	0.45	0.459459	0.535714	100	185	140
195	1	28	3	1	6	6	0	30	0	0	0	30	30	0	15	0	25	40	0	0	0	25	0	35	0	0	15	15	0	40	75	150	75	0.75	0.810811	0.535714	100	185	140
196	0	25	3	1	3	3	20	0	15	0	0	0	30	15	0	0	25	40	0	0	0	25	0	35	0	0	15	15	0	40	75	120	80	0.75	0.648649	0.571429	100	185	140
197	0	26	3	1	4	4	20	0	15	0	0	0	30	15	0	0	25	40	0	0	0	25	0	0	0	0	15	0	0	40	40	120	65	0.4	0.648649	0.464286	100	185	140
198	1	31	3	1	10	10	20	0	15	0	0	30	30	15	15	0	25	40	0	0	0	25	0	35	0	0	0	0	0	40	75	150	65	0.75	0.810811	0.464286	100	185	140
199	0	35	3	1	11	11	20	0	0	0	5	0	30	15	0	0	0	40	0	0	0	25	0	35	0	0	15	15	0	40	75	95	70	0.75	0.513514	0.5	100	185	140
200	0	31	2	1	10	10	20	30	15	0	0	30	30	15	0	0	25	40	0	0	0	25	0	35	0	0	0	15	0	40	75	135	110	0.75	0.72973	0.785714	100	185	140
201	1	28	2	1	7	7	20	30	15	0	0	0	30	0	15	0	0	40	0	5	0	25	0	0	0	0	0	0	0	40	40	80	100	0.4	0.432432	0.714286	100	185	140
202	0	23	3	1	2	2	20	30	0	0	0	0	0	0	0	0	0	40	0	5	0	25	0	35	0	0	15	0	0	40	75	80	55	0.75	0.432432	0.392857	100	185	140
203	1	24	2	1	1	1	20	0	0	0	5	0	0	0	15	0	25	40	0	0	0	25	0	0	0	0	0	15	0	40	40	105	40	0.4	0.567568	0.285714	100	185	140
204	0	26	2	1	4	4	20	30	15	0	5	0	30	15	0	0	25	40	5	0	0	25	10	35	0	0	0	0	0	40	75	120	100	0.75	0.648649	0.714286	100	185	140
205	1	25	2	1	3	3	0	30	0	0	0	30	0	0	0	0	0	40	0	0	0	25	10	35	0	0	0	0	0	40	75	105	30	0.75	0.567568	0.214286	100	185	140
206	1	34	2	1	13	13	0	30	15	15	0	30	30	15	0	0	25	40	0	0	5	25	0	35	0	0	15	15	10	40	100	150	95	1	0.810811	0.678571	100	185	140
207	0	28	2	1	4	4	0	0	15	0	0	0	30	15	0	0	25	40	0	5	0	25	0	0	0	0	0	0	0	0	0	105	50	0	0.567568	0.357143	100	185	140
208	0	31	2	1	2	2	20	0	15	0	0	0	0	15	15	0	25	40	0	0	0	25	0	35	0	0	15	0	0	40	75	135	35	0.75	0.72973	0.25	100	185	140
209	1	23	2	1	2	2	20	0	15	0	0	30	0	0	0	0	25	40	0	0	0	0	0	0	0	0	15	0	0	0	0	110	35	0	0.594595	0.25	100	185	140
210	0	22	2	1	1	1	20	30	15	0	0	30	30	0	0	0	25	0	0	0	0	25	10	35	0	0	15	0	0	40	75	105	95	0.75	0.567568	0.678571	100	185	140
211	1	26	2	1	4	4	20	30	0	0	0	0	30	0	15	0	0	40	0	0	0	25	0	35	0	0	15	0	0	40	75	95	80	0.75	0.513514	0.571429	100	185	140
212	0	31	2	1	1	1	20	30	15	0	0	0	0	15	15	0	25	0	0	5	5	25	0	35	0	0	15	0	0	40	75	95	75	0.75	0.513514	0.535714	100	185	140
213	1	22	2	1	1	1	20	30	0	0	0	30	30	15	0	0	0	40	0	0	5	25	10	0	0	0	15	15	0	0	0	135	100	0	0.72973	0.714286	100	185	140
214	0	34	2	1	3	3	20	0	15	0	0	0	0	15	0	0	25	40	0	0	0	25	0	35	0	0	15	0	0	40	75	120	35	0.75	0.648649	0.25	100	185	140
215	1	28	2	1	8	8	20	30	15	15	5	30	30	0	0	5	0	40	0	0	0	0	0	35	0	0	15	0	0	40	90	85	105	0.9	0.459459	0.75	100	185	140
216	1	36	3	1	3	3	20	0	15	15	0	30	30	15	0	0	25	40	0	5	0	25	0	35	0	0	0	15	0	40	90	135	85	0.9	0.72973	0.607143	100	185	140
217	1	52	3	1	1	1	0	30	0	15	0	0	30	0	15	0	25	40	0	0	0	0	0	35	0	0	0	15	0	40	90	80	75	0.9	0.432432	0.535714	100	185	140
218	0	22	3	1	1	1	20	0	0	0	5	0	0	15	0	5	0	40	0	0	0	25	0	35	0	0	15	0	10	40	85	95	30	0.85	0.513514	0.214286	100	185	140
219	1	33	2	1	12	12	20	30	15	0	5	30	30	15	15	5	25	40	0	0	5	25	0	0	0	0	0	15	10	40	50	150	125	0.5	0.810811	0.892857	100	185	140
220	1	28	2	1	6	6	20	0	15	0	0	0	30	15	0	0	25	40	0	0	0	25	0	35	0	0	15	0	10	40	85	120	65	0.85	0.648649	0.464286	100	185	140
221	0	32	2	1	10	10	20	30	15	0	0	30	0	15	0	0	0	40	0	0	0	0	0	35	0	0	15	0	10	0	45	100	65	0.45	0.540541	0.464286	100	185	140
222	0	29	2	1	7	7	20	0	0	0	0	30	30	15	0	0	0	40	5	0	0	25	0	35	5	0	15	0	0	40	75	135	50	0.75	0.72973	0.357143	100	185	140
223	1	24	2	1	2	2	20	30	0	0	0	30	0	0	15	0	25	40	0	0	0	0	0	35	0	0	0	15	0	40	75	110	65	0.75	0.594595	0.464286	100	185	140
224	1	27	3	1	6	6	20	30	0	0	0	30	0	15	0	0	25	40	0	0	0	25	0	35	0	0	0	15	0	40	75	135	65	0.75	0.72973	0.464286	100	185	140
225	0	32	3	1	8	8	20	0	0	0	0	30	0	0	0	5	25	40	0	0	0	25	0	0	0	0	15	15	0	0	0	135	40	0	0.72973	0.285714	100	185	140
226	0	25	3	1	1	1	0	30	0	0	0	0	30	0	0	0	0	0	0	0	0	0	0	0	0	0	0	0	0	0	0	0	60	0	0	0.428571	100	185	140
227	1	36	3	1	12	12	20	30	0	0	0	30	0	15	15	5	25	40	0	0	0	0	0	35	0	0	0	0	0	40	75	125	55	0.75	0.675676	0.392857	100	185	140
228	0	29	2	1	8	8	20	0	15	0	0	30	0	15	0	5	25	40	0	0	0	25	10	35	0	10	0	15	0	40	75	145	65	0.75	0.783784	0.464286	100	185	140
229	0	27	2	1	4	4	20	30	0	0	0	30	30	0	0	0	25	0	0	5	0	0	10	35	0	0	0	15	0	40	75	65	100	0.75	0.351351	0.714286	100	185	140
230	1	23	3	1	2	2	20	0	15	0	0	30	30	15	0	0	25	40	0	0	0	25	0	35	0	10	0	0	0	40	75	135	75	0.75	0.72973	0.535714	100	185	140
231	1	28	2	1	4	4	20	0	0	0	5	30	0	0	15	5	25	40	0	0	0	0	10	35	0	0	0	15	0	40	75	120	45	0.75	0.648649	0.321429	100	185	140
232	0	34	3	1	6	6	0	0	0	0	0	30	30	0	15	0	0	40	0	0	5	0	0	35	0	0	15	15	0	0	35	100	50	0.35	0.540541	0.357143	100	185	140
233	0	38	3	1	17	17	20	0	15	0	0	0	30	15	0	0	0	40	0	0	0	0	0	0	0	0	0	15	0	0	0	55	80	0	0.297297	0.571429	100	185	140
234	0	35	3	1	14	14	0	0	0	0	0	0	0	15	0	0	25	40	0	0	0	25	0	35	0	0	15	0	0	40	75	120	0	0.75	0.648649	0	100	185	140
235	0	35	2	1	14	14	20	0	0	0	0	30	30	0	0	0	0	40	0	0	0	0	0	0	5	0	0	15	0	0	0	75	65	0	0.405405	0.464286	100	185	140
236	0	33	2	1	11	11	20	30	0	0	0	0	30	15	0	0	25	40	0	0	5	25	0	0	0	0	0	15	0	40	40	105	100	0.4	0.567568	0.714286	100	185	140
237	1	38	2	1	18	18	20	0	0	0	0	0	30	15	0	0	25	40	0	0	0	25	0	35	0	0	0	15	0	40	75	105	65	0.75	0.567568	0.464286	100	185	140
238	0	37	2	1	13	13	20	0	0	0	0	30	30	15	0	0	0	40	0	0	0	25	0	0	0	0	0	15	0	40	40	110	65	0.4	0.594595	0.464286	100	185	140
239	0	29	2	1	10	10	20	0	0	0	0	0	0	15	0	0	0	40	0	0	0	25	0	0	0	0	15	15	0	0	0	95	35	0	0.513514	0.25	100	185	140
240	1	34	3	1	14	14	0	0	0	0	0	0	30	15	0	0	25	40	0	0	0	25	0	0	0	0	0	0	0	0	0	105	30	0	0.567568	0.214286	100	185	140
241	1	27	2	1	8	8	20	30	0	0	0	30	30	15	0	0	25	40	0	0	0	25	0	35	0	0	15	0	0	40	75	150	80	0.75	0.810811	0.571429	100	185	140
242	0	35	3	1	14	14	20	0	0	0	0	0	30	15	0	0	25	40	0	0	0	0	10	35	0	0	0	0	0	40	75	90	50	0.75	0.486486	0.357143	100	185	140
243	0	38	2	1	16	16	20	30	0	0	0	0	30	0	15	0	0	40	0	0	0	0	0	0	0	0	0	15	0	0	0	55	95	0	0.297297	0.678571	100	185	140
244	1	28	2	1	7	7	20	30	0	0	0	0	30	15	0	0	0	40	0	0	0	25	0	35	0	0	15	0	0	40	75	95	80	0.75	0.513514	0.571429	100	185	140
245	0	26	2	1	5	5	0	30	0	0	0	0	0	0	0	0	25	40	0	0	0	0	0	35	0	0	0	15	0	40	75	65	45	0.75	0.351351	0.321429	100	185	140
246	0	29	2	1	8	8	20	0	15	0	0	30	30	0	15	0	0	40	0	0	0	25	0	35	0	0	0	15	0	40	75	110	80	0.75	0.594595	0.571429	100	185	140
247	1	33	2	1	10	10	0	30	0	0	0	0	30	0	15	0	0	40	0	0	0	0	0	0	0	0	0	15	0	0	0	55	75	0	0.297297	0.535714	100	185	140
248	0	28	2	1	8	8	0	30	0	0	0	0	30	0	15	0	25	40	0	0	0	0	0	0	0	0	0	15	0	40	40	80	75	0.4	0.432432	0.535714	100	185	140
249	0	26	3	1	6	6	20	0	15	0	0	0	0	0	0	0	25	40	0	0	0	0	0	35	0	0	0	15	0	0	35	65	50	0.35	0.351351	0.357143	100	185	140
250	1	33	3	1	12	12	20	0	0	0	5	0	30	15	0	0	25	40	0	0	0	0	0	0	0	0	0	0	0	0	0	80	55	0	0.432432	0.392857	100	185	140
251	0	33	3	1	12	12	20	0	0	0	0	0	30	15	0	0	25	40	0	0	0	25	10	35	0	0	15	0	0	40	75	130	50	0.75	0.702703	0.357143	100	185	140
252	1	42	3	1	16	16	20	0	0	0	5	30	30	15	0	0	0	40	0	0	0	25	0	0	0	0	0	15	0	40	40	110	70	0.4	0.594595	0.5	100	185	140
253	1	34	3	1	12	12	20	30	0	0	0	0	30	15	0	0	25	40	0	0	0	25	10	0	0	0	0	15	0	0	0	115	95	0	0.621622	0.678571	100	185	140
254	0	39	2	1	17	17	20	0	0	0	5	0	30	15	0	0	0	40	0	0	0	0	0	35	0	10	0	15	0	0	35	55	80	0.35	0.297297	0.571429	100	185	140
255	0	40	2	1	20	20	0	0	0	0	0	30	30	15	0	0	25	40	0	0	0	25	0	35	0	0	0	15	10	0	45	135	45	0.45	0.72973	0.321429	100	185	140
256	0	42	2	1	22	22	20	0	15	0	0	30	30	15	0	0	25	40	0	0	5	25	10	0	5	0	0	15	10	0	10	150	85	0.1	0.810811	0.607143	100	185	140
257	0	41	3	1	21	21	20	0	0	0	5	0	30	15	0	0	25	40	0	0	0	25	10	35	0	0	0	15	0	40	75	115	70	0.75	0.621622	0.5	100	185	140
258	0	31	3	1	12	12	20	0	0	0	5	0	30	15	0	0	25	40	0	0	0	25	0	35	0	0	0	15	0	40	75	105	70	0.75	0.567568	0.5	100	185	140
259	1	21	1	0	0	4	20	30	0	0	0	0	30	0	0	0	0	0	0	0	0	25	0	0	0	0	15	15	0	0	0	40	95	0	0.216216	0.678571	100	185	140
260	1	21	1	0	0	4	0	0	15	0	0	0	0	0	0	0	0	0	0	5	0	0	0	0	0	10	0	15	0	0	0	0	45	0	0	0.321429	100	185	140
261	1	21	1	0	0	4	20	0	0	0	0	0	30	0	0	0	0	0	0	0	5	0	0	0	0	0	0	15	0	0	0	0	70	0	0	0.5	100	185	140
262	1	21	1	0	0	4	20	0	15	0	0	30	30	0	15	0	0	40	0	0	0	25	0	0	0	0	15	0	0	0	0	125	65	0	0.675676	0.464286	100	185	140
263	1	21	1	0	0	4	20	0	0	0	0	0	30	0	0	0	0	40	0	0	0	25	0	0	0	0	0	0	0	0	0	65	50	0	0.351351	0.357143	100	185	140
264	1	21	1	0	0	4	0	0	0	0	0	0	0	0	15	0	25	40	0	0	0	0	10	0	0	0	0	0	0	0	0	90	0	0	0.486486	0	100	185	140
265	1	21	1	0	0	4	20	0	0	0	5	0	30	0	15	0	0	40	0	0	0	25	0	35	0	0	15	15	0	0	35	95	70	0.35	0.513514	0.5	100	185	140
266	1	22	1	0	0	4	20	0	0	0	5	0	0	0	0	0	25	0	0	0	0	25	0	35	0	0	0	15	0	40	75	50	40	0.75	0.27027	0.285714	100	185	140
267	1	22	1	0	0	4	20	0	15	0	0	0	30	0	0	0	25	0	0	0	0	0	0	0	0	0	0	15	0	40	40	25	80	0.4	0.135135	0.571429	100	185	140
268	1	21	1	0	0	4	20	0	0	0	0	0	0	0	0	0	0	40	0	0	0	25	0	0	0	0	0	15	0	0	0	65	35	0	0.351351	0.25	100	185	140
269	1	21	1	0	0	4	20	0	0	0	5	0	30	0	0	0	25	40	0	0	0	25	10	0	0	0	0	15	0	0	0	100	70	0	0.540541	0.5	100	185	140
270	1	21	1	0	0	4	20	0	0	0	0	0	30	0	0	0	0	40	0	0	0	25	0	0	0	0	0	15	0	40	40	65	65	0.4	0.351351	0.464286	100	185	140
271	1	21	1	0	0	4	0	30	0	0	0	0	30	0	0	0	0	40	0	0	0	25	0	0	0	0	15	15	0	0	0	80	75	0	0.432432	0.535714	100	185	140
272	1	21	1	0	0	4	20	0	15	0	0	0	30	0	0	0	0	40	0	0	0	25	0	0	0	0	0	15	0	0	0	65	80	0	0.351351	0.571429	100	185	140
273	0	22	1	0	0	4	20	0	0	0	5	0	30	0	0	0	0	40	0	0	0	25	0	0	0	0	0	15	0	0	0	65	70	0	0.351351	0.5	100	185	140
274	1	22	1	0	0	4	20	0	15	0	0	0	30	0	15	0	0	40	0	0	0	25	0	0	0	0	0	0	0	40	40	80	65	0.4	0.432432	0.464286	100	185	140
275	1	21	1	0	0	4	0	0	0	0	0	0	30	0	15	0	0	0	0	0	0	25	0	0	5	0	0	15	0	0	0	45	45	0	0.243243	0.321429	100	185	140
276	1	21	1	0	0	4	20	0	15	0	0	0	30	0	0	0	25	0	0	0	0	25	0	0	0	0	0	15	0	0	0	50	80	0	0.27027	0.571429	100	185	140
277	0	21	1	0	0	4	20	0	0	0	0	0	30	0	0	0	25	0	0	0	0	25	0	0	0	0	0	0	0	40	40	50	50	0.4	0.27027	0.357143	100	185	140
278	1	21	1	0	0	4	20	0	15	0	0	0	0	0	0	0	0	0	0	0	0	0	10	0	0	0	0	0	0	0	0	10	35	0	0.0540541	0.25	100	185	140
279	0	22	1	0	0	4	0	0	0	0	0	0	0	0	0	0	25	0	0	0	0	0	0	0	0	0	0	15	0	0	0	25	15	0	0.135135	0.107143	100	185	140
280	1	21	1	0	0	4	20	0	15	0	0	0	0	0	0	0	0	40	0	0	0	25	0	35	5	0	15	0	0	40	75	85	35	0.75	0.459459	0.25	100	185	140
281	0	21	1	0	0	4	0	30	0	0	0	30	30	0	0	0	0	40	0	0	0	25	0	35	0	0	0	15	0	40	75	95	75	0.75	0.513514	0.535714	100	185	140
282	1	21	1	0	0	4	0	0	15	0	0	30	30	0	0	0	0	40	0	0	0	0	0	35	0	0	0	0	10	0	45	70	45	0.45	0.378378	0.321429	100	185	140
283	0	24	1	0	0	4	0	0	0	0	0	0	0	0	0	0	0	40	0	0	0	0	0	0	0	0	15	0	0	0	0	55	0	0	0.297297	0	100	185	140
284	1	21	1	0	0	4	20	0	0	0	0	0	30	15	0	0	25	40	0	0	0	0	10	35	0	0	0	15	0	40	75	90	65	0.75	0.486486	0.464286	100	185	140
285	1	18	1	0	0	1	0	0	0	0	0	0	0	0	0	0	25	40	0	0	0	0	0	0	0	0	0	15	0	0	0	65	15	0	0.351351	0.107143	100	185	140
286	1	18	1	0	0	1	0	30	0	0	0	30	0	0	15	0	0	40	0	0	0	0	0	0	5	0	0	0	0	0	0	90	30	0	0.486486	0.214286	100	185	140
287	1	18	1	0	0	1	0	0	0	0	5	0	0	0	0	0	0	40	0	0	0	25	0	0	0	0	0	15	0	0	0	65	20	0	0.351351	0.142857	100	185	140
288	0	19	1	0	0	1	0	30	0	0	0	0	0	0	0	0	0	0	0	0	0	0	10	0	0	0	0	0	0	0	0	10	30	0	0.0540541	0.214286	100	185	140
289	0	20	1	0	0	1	0	0	15	0	0	0	30	0	0	0	0	0	0	0	5	0	0	0	0	0	0	15	0	0	0	0	65	0	0	0.464286	100	185	140
290	1	18	1	0	0	1	0	0	0	0	0	0	0	0	0	0	25	0	0	0	0	25	0	0	0	0	0	15	0	0	0	50	15	0	0.27027	0.107143	100	185	140
291	1	19	1	0	0	1	0	0	0	0	0	0	0	0	0	0	0	40	0	0	0	25	0	0	0	0	15	0	0	0	0	80	0	0	0.432432	0	100	185	140
292	0	19	1	0	0	1	0	30	0	0	0	0	0	0	0	0	0	0	0	0	0	0	0	0	0	0	0	0	0	0	0	0	30	0	0	0.214286	100	185	140
293	0	18	1	0	0	1	0	0	15	0	0	30	0	0	0	0	0	0	0	5	0	0	0	0	0	0	0	0	0	0	0	30	20	0	0.162162	0.142857	100	185	140
294	1	18	1	0	0	1	0	0	15	0	0	0	0	0	0	0	0	40	0	0	0	25	0	0	0	0	0	0	0	0	0	65	15	0	0.351351	0.107143	100	185	140
295	1	18	1	0	0	1	20	0	0	0	0	0	0	0	0	0	0	0	5	0	0	0	0	0	0	0	0	15	0	0	0	5	35	0	0.027027	0.25	100	185	140
296	1	19	1	0	0	1	0	0	15	15	0	0	0	0	0	0	25	0	0	5	0	25	0	0	0	0	0	0	0	0	15	50	20	0.15	0.27027	0.142857	100	185	140
297	0	18	1	0	0	1	0	30	0	0	0	0	0	0	0	0	0	0	0	5	0	0	0	0	0	0	0	0	0	0	0	0	35	0	0	0.25	100	185	140
298	1	18	1	0	0	1	0	0	15	0	0	30	0	0	0	0	25	0	0	0	5	25	0	0	0	0	15	0	0	0	0	95	20	0	0.513514	0.142857	100	185	140
299	1	18	1	0	0	1	0	30	0	0	0	0	0	0	0	0	0	40	0	0	0	0	0	0	0	0	0	0	0	0	0	40	30	0	0.216216	0.214286	100	185	140
300	0	19	1	0	0	1	0	30	15	0	0	0	0	0	0	0	0	0	0	0	5	0	0	35	0	0	0	0	0	0	35	0	50	0.35	0	0.357143	100	185	140
301	1	18	1	0	0	1	0	0	15	0	0	0	0	0	0	0	0	40	0	0	0	0	0	0	0	0	0	0	0	0	0	40	15	0	0.216216	0.107143	100	185	140
302	0	18	1	0	0	1	0	0	0	0	0	0	0	0	0	0	25	0	0	0	0	25	0	0	0	0	0	0	0	0	0	50	0	0	0.27027	0	100	185	140
303	0	21	0	0	0	4	0	0	15	0	0	0	0	15	0	0	0	0	0	0	0	0	0	0	0	0	0	0	0	0	0	15	15	0	0.0810811	0.107143	100	185	140
304	1	21	0	0	0	4	0	0	15	15	0	0	0	0	0	0	0	40	0	0	0	0	0	35	0	0	0	15	0	0	50	40	30	0.5	0.216216	0.214286	100	185	140
305	1	21	0	0	0	4	0	0	15	0	0	0	0	15	0	0	0	40	0	0	0	0	0	0	0	0	0	15	0	0	0	55	30	0	0.297297	0.214286	100	185	140
306	0	22	0	0	0	4	0	0	0	0	5	0	30	0	15	0	25	40	0	0	0	0	0	0	0	0	0	15	0	0	0	80	50	0	0.432432	0.357143	100	185	140
307	1	21	0	0	0	4	0	0	0	0	0	0	0	15	0	0	25	0	0	0	0	0	0	0	0	0	0	15	0	0	0	40	15	0	0.216216	0.107143	100	185	140
308	0	21	0	0	0	4	0	0	15	0	0	0	30	0	15	0	0	0	0	5	5	25	0	0	0	0	0	15	0	40	40	40	70	0.4	0.216216	0.5	100	185	140
309	0	24	0	0	0	4	0	30	0	0	0	0	0	0	15	5	0	0	0	0	5	0	0	0	0	0	0	15	0	0	0	15	55	0	0.0810811	0.392857	100	185	140
310	0	21	0	0	0	4	0	30	0	0	0	0	30	0	0	0	25	0	0	5	0	0	0	0	0	0	0	15	0	0	0	25	80	0	0.135135	0.571429	100	185	140
311	0	22	0	0	0	4	0	0	15	0	0	0	30	15	0	0	25	0	0	5	5	0	0	0	0	0	15	15	0	0	0	55	70	0	0.297297	0.5	100	185	140
312	0	21	0	0	0	4	20	0	15	0	0	0	30	15	0	0	0	40	0	0	0	0	10	0	0	0	0	15	0	0	0	65	80	0	0.351351	0.571429	100	185	140
313	1	21	0	0	0	4	0	30	0	0	0	0	30	15	0	0	25	40	0	0	0	0	10	0	0	0	15	0	0	0	0	105	60	0	0.567568	0.428571	100	185	140
314	1	21	0	0	0	4	20	0	15	0	0	0	30	15	0	0	0	0	0	0	0	25	0	0	0	0	0	15	0	40	40	40	80	0.4	0.216216	0.571429	100	185	140
315	1	21	0	0	0	4	0	0	15	0	0	0	30	0	0	0	25	0	0	0	0	0	0	0	0	0	0	15	0	0	0	25	60	0	0.135135	0.428571	100	185	140
316	1	21	0	0	0	4	0	0	0	0	0	0	0	0	0	0	0	40	0	0	0	25	0	0	0	0	0	15	0	0	0	65	15	0	0.351351	0.107143	100	185	140
317	1	21	0	0	0	4	20	0	0	0	0	0	0	0	0	0	25	40	0	0	0	0	0	35	0	0	15	0	0	0	35	80	20	0.35	0.432432	0.142857	100	185	140
318	0	18	0	0	0	1	0	0	15	0	0	30	0	0	0	0	0	40	0	0	0	0	0	0	0	0	0	15	0	0	0	70	30	0	0.378378	0.214286	100	185	140
319	0	18	0	0	0	1	0	0	15	0	0	0	0	0	0	5	25	0	0	0	5	0	0	35	0	0	0	0	0	0	35	25	25	0.35	0.135135	0.178571	100	185	140
320	0	19	0	0	0	1	0	0	0	0	0	0	0	15	0	0	0	0	0	0	0	0	0	35	0	10	0	0	0	40	75	15	10	0.75	0.0810811	0.0714286	100	185	140
321	1	18	0	0	0	1	0	0	15	0	0	0	0	0	0	0	0	0	0	0	0	25	0	0	0	0	0	15	0	0	0	25	30	0	0.135135	0.214286	100	185	140
322	0	18	0	0	0	1	20	0	15	0	0	0	30	0	0	0	0	0	0	5	0	0	0	35	0	0	0	15	0	0	35	0	85	0.35	0	0.607143	100	185	140
323	0	18	0	0	0	1	20	0	0	15	0	0	0	15	0	5	0	0	0	0	0	0	0	0	0	0	0	15	0	0	15	15	40	0.15	0.0810811	0.285714	100	185	140
324	1	18	0	0	0	1	0	0	0	0	0	0	0	0	0	5	0	40	0	0	0	0	0	35	0	0	0	0	0	0	35	40	5	0.35	0.216216	0.0357143	100	185	140
325	0	18	0	0	0	1	0	0	0	0	0	0	0	0	0	0	25	40	0	0	0	0	0	35	0	0	0	0	0	0	35	65	0	0.35	0.351351	0	100	185	140
326	1	18	0	0	0	1	0	0	0	15	0	0	0	0	0	0	0	40	0	0	0	0	0	35	0	0	0	0	0	0	50	40	0	0.5	0.216216	0	100	185	140
327	1	18	0	0	0	1	0	0	0	0	0	0	0	0	0	0	0	0	0	0	0	0	0	0	0	0	0	15	0	0	0	0	15	0	0	0.107143	100	185	140
328	1	18	0	0	0	1	0	0	0	0	0	0	0	0	0	0	0	0	0	0	5	0	0	0	0	0	0	0	0	0	0	0	5	0	0	0.0357143	100	185	140
329	0	18	0	0	0	1	0	0	15	15	0	0	0	0	0	0	0	40	0	0	0	0	0	35	0	0	0	15	0	40	90	40	30	0.9	0.216216	0.214286	100	185	140
330	0	18	0	0	0	1	0	0	0	0	0	0	0	15	0	0	25	0	0	5	0	25	0	35	0	0	0	15	0	40	75	65	20	0.75	0.351351	0.142857	100	185	140
331	0	18	0	0	0	1	0	0	0	0	0	0	0	15	0	0	0	40	0	0	5	0	0	35	0	0	0	0	0	0	35	55	5	0.35	0.297297	0.0357143	100	185	140
332	0	18	0	0	0	1	0	0	0	0	0	0	0	15	0	0	0	40	0	0	0	0	0	0	0	0	0	0	0	40	40	55	0	0.4	0.297297	0	100	185	140
333	0	18	0	0	0	1	0	0	0	15	0	0	0	0	0	0	0	40	0	0	0	0	0	0	0	0	0	15	0	0	15	40	15	0.15	0.216216	0.107143	100	185	140
334	0	18	0	0	0	1	0	0	0	0	0	0	0	0	0	0	0	0	0	0	0	0	0	35	0	0	0	0	0	0	35	0	0	0.35	0	0	100	185	140
335	0	18	0	0	0	1	0	0	0	0	0	0	0	0	0	0	0	0	0	0	0	25	0	0	0	0	0	15	0	0	0	25	15	0	0.135135	0.107143	100	185	140
336	0	18	0	0	0	1	0	0	0	0	0	0	30	0	0	0	0	0	0	0	0	0	0	0	0	0	0	0	0	0	0	0	30	0	0	0.214286	100	185	140
337	0	18	0	0	0	1	0	0	0	0	0	0	0	15	0	0	0	0	0	5	0	0	0	35	0	0	0	15	0	0	35	15	20	0.35	0.0810811	0.142857	100	185	140
338	0	18	0	0	0	1	0	0	0	0	0	0	0	15	0	0	25	40	0	0	0	25	0	0	0	0	0	0	0	0	0	105	0	0	0.567568	0	100	185	140
339	0	18	0	0	0	1	0	0	0	0	0	0	0	0	15	0	0	0	0	0	5	0	0	0	0	0	0	15	0	0	0	15	20	0	0.0810811	0.142857	100	185	140
340	1	19	0	0	0	1	0	0	15	0	0	0	0	15	0	5	0	0	0	5	0	0	0	35	0	0	0	15	0	40	75	15	40	0.75	0.0810811	0.285714	100	185	140
341	0	19	0	0	0	1	0	0	0	0	0	0	0	0	0	0	25	0	0	0	0	0	0	0	0	0	0	15	0	40	40	25	15	0.4	0.135135	0.107143	100	185	140
342	0	19	0	0	0	1	0	0	0	0	0	0	0	15	0	0	0	0	0	5	5	0	0	0	0	0	0	15	0	0	0	15	25	0	0.0810811	0.178571	100	185	140
343	1	19	0	0	0	1	20	30	0	0	0	0	0	15	0	5	0	0	0	5	0	25	0	35	0	0	0	0	0	40	75	40	60	0.75	0.216216	0.428571	100	185	140
344	0	18	0	0	0	1	0	0	15	0	0	0	0	15	0	0	0	40	0	0	0	0	0	0	0	0	0	15	0	0	0	55	30	0	0.297297	0.214286	100	185	140
345	0	18	0	0	0	1	0	0	15	0	0	0	0	0	0	0	0	0	0	0	0	0	0	0	0	0	0	15	0	0	0	0	30	0	0	0.214286	100	185	140
346	0	19	0	0	0	1	0	0	0	0	0	0	0	15	0	0	0	0	0	0	0	0	0	0	0	0	0	0	0	0	0	15	0	0	0.0810811	0	100	185	140
347	0	18	0	0	0	1	0	0	15	0	0	0	0	15	0	0	0	40	0	0	0	0	0	0	0	0	0	0	10	0	10	55	15	0.1	0.297297	0.107143	100	185	140
348	0	18	0	0	0	1	0	0	15	0	0	0	0	15	0	0	25	0	0	0	0	0	0	35	0	0	0	15	0	0	35	40	30	0.35	0.216216	0.214286	100	185	140
349	0	19	0	0	0	1	0	0	15	0	0	30	0	0	0	0	0	0	0	0	5	0	0	35	0	0	0	15	0	0	35	30	35	0.35	0.162162	0.25	100	185	140
350	0	18	0	0	0	1	0	30	0	0	0	0	0	0	0	0	0	40	0	0	0	0	0	0	0	10	0	0	0	0	0	40	40	0	0.216216	0.285714	100	185	140
351	0	18	0	0	0	1	0	0	0	0	0	0	0	0	0	0	0	0	0	0	5	0	0	0	0	0	15	0	0	0	0	15	5	0	0.0810811	0.0357143	100	185	140
352	1	18	0	0	0	1	0	0	0	15	0	0	0	15	0	0	25	40	0	0	0	25	0	35	0	0	0	15	0	0	50	105	15	0.5	0.567568	0.107143	100	185	140
353	0	19	0	0	0	1	20	0	0	0	0	0	0	0	15	0	25	40	0	0	0	0	0	35	0	0	15	0	0	0	35	95	20	0.35	0.513514	0.142857	100	185	140
354	0	19	0	0	0	1	0	0	0	15	0	30	0	0	0	0	0	0	0	0	0	0	0	35	0	0	0	15	0	40	90	30	15	0.9	0.162162	0.107143	100	185	140
355	1	18	0	0	0	1	20	30	0	0	0	0	0	15	0	0	0	40	0	0	0	25	0	0	0	0	0	15	0	0	0	80	65	0	0.432432	0.464286	100	185	140
356	1	18	0	0	0	1	0	0	0	15	0	0	0	0	0	0	25	0	0	0	0	0	0	0	0	0	15	0	0	0	15	40	0	0.15	0.216216	0	100	185	140
357	0	18	0	0	0	1	0	30	0	0	0	0	0	15	15	0	0	40	0	0	0	0	0	35	0	0	0	15	0	0	35	70	45	0.35	0.378378	0.321429	100	185	140
358	0	19	0	0	0	1	0	0	0	15	0	0	0	15	0	0	0	40	0	0	0	0	0	35	0	0	0	15	0	40	90	55	15	0.9	0.297297	0.107143	100	185	140
359	0	19	0	0	0	1	0	0	15	0	0	0	0	0	15	0	0	40	0	0	0	0	0	35	0	0	0	15	0	0	35	55	30	0.35	0.297297	0.214286	100	185	140
360	0	19	0	0	0	1	20	0	15	0	0	0	0	15	0	0	0	0	0	5	0	0	0	0	0	0	0	0	0	0	0	15	40	0	0.0810811	0.285714	100	185	140
361	0	18	0	0	0	1	0	0	15	0	0	0	0	0	0	0	25	0	0	0	0	0	0	35	0	10	0	15	0	0	35	25	40	0.35	0.135135	0.285714	100	185	140
362	0	18	0	0	0	1	0	0	15	0	0	30	0	15	0	0	0	0	0	0	5	0	0	0	0	0	0	15	0	0	0	45	35	0	0.243243	0.25	100	185	140
363	0	18	0	0	0	1	0	0	0	15	0	0	0	15	0	0	0	0	0	5	0	25	0	0	0	0	0	15	0	40	55	40	20	0.55	0.216216	0.142857	100	185	140
364	1	18	0	0	0	1	0	0	0	15	0	0	0	15	0	0	0	40	0	0	0	25	0	35	0	0	0	15	0	0	50	80	15	0.5	0.432432	0.107143	100	185	140
365	0	18	0	0	0	1	0	0	0	0	0	0	0	0	15	0	0	0	0	5	0	0	0	0	0	0	0	15	0	0	0	15	20	0	0.0810811	0.142857	100	185	140
366	0	18	0	0	0	1	0	0	15	0	0	0	0	0	0	0	0	40	0	0	0	0	0	0	0	0	0	15	0	0	0	40	30	0	0.216216	0.214286	100	185	140
367	1	18	0	0	0	1	0	0	0	15	0	0	0	15	0	0	0	40	0	0	0	0	0	0	0	0	0	0	0	40	55	55	0	0.55	0.297297	0	100	185	140
368	0	18	0	0	0	1	0	0	15	0	0	0	0	0	15	0	0	0	0	5	0	0	0	0	0	0	0	15	0	40	40	15	35	0.4	0.0810811	0.25	100	185	140
369	0	18	0	0	0	1	0	0	0	0	0	0	0	0	0	0	25	0	0	0	0	0	0	0	0	0	0	15	0	0	0	25	15	0	0.135135	0.107143	100	185	140
370	0	18	0	0	0	1	0	0	0	0	0	0	0	15	0	0	0	40	0	0	0	0	0	0	0	0	0	15	0	0	0	55	15	0	0.297297	0.107143	100	185	140
371	1	19	0	0	0	1	0	0	15	0	0	0	0	0	0	0	0	40	0	0	0	0	0	0	0	0	0	15	0	0	0	40	30	0	0.216216	0.214286	100	185	140
372	0	22	0	0	0	4	0	0	15	0	0	30	30	15	0	0	25	40	0	0	0	0	0	0	0	0	15	0	0	40	40	125	45	0.4	0.675676	0.321429	100	185	140
373	1	22	0	0	0	4	20	0	15	0	0	30	30	15	0	0	25	40	0	0	0	0	0	35	0	0	15	0	0	40	75	125	65	0.75	0.675676	0.464286	100	185	140
374	1	21	0	0	0	4	0	0	15	0	0	0	0	0	0	5	25	40	0	0	0	0	0	35	0	0	0	15	0	40	75	65	35	0.75	0.351351	0.25	100	185	140
375	1	21	0	0	0	4	0	30	0	0	0	30	0	15	0	0	25	40	0	0	0	25	10	35	0	0	0	15	0	40	75	145	45	0.75	0.783784	0.321429	100	185	140
376	1	21	0	0	0	4	20	0	15	0	0	0	30	15	0	0	0	40	0	0	0	25	0	35	0	0	0	0	10	0	45	80	65	0.45	0.432432	0.464286	100	185	140
377	0	22	0	0	0	4	20	30	0	0	0	30	0	0	15	0	25	40	0	0	0	25	0	35	0	10	0	15	10	0	45	135	75	0.45	0.72973	0.535714	100	185	140
378	0	22	0	0	0	4	0	0	0	0	0	0	0	0	15	0	0	40	0	0	0	0	0	0	0	0	0	0	0	0	0	55	0	0	0.297297	0	100	185	140
379	0	21	0	0	0	4	0	0	0	0	0	30	0	0	0	0	0	40	0	0	0	0	0	0	0	0	0	15	0	0	0	70	15	0	0.378378	0.107143	100	185	140
380	1	21	0	0	0	4	0	0	15	0	0	0	0	0	0	0	0	0	0	5	0	0	0	35	0	0	0	15	0	40	75	0	35	0.75	0	0.25	100	185	140
381	1	21	0	0	0	4	20	0	15	0	0	0	0	0	15	0	25	40	0	0	0	25	0	0	0	0	15	15	0	0	0	120	50	0	0.648649	0.357143	100	185	140
382	1	22	0	0	0	4	0	30	0	0	0	0	0	0	15	0	25	40	0	0	0	0	0	35	0	0	0	15	0	0	35	80	45	0.35	0.432432	0.321429	100	185	140
383	0	21	0	0	0	4	20	0	15	0	0	0	0	0	15	0	0	40	0	0	0	0	0	35	0	0	30	0	0	40	75	85	35	0.75	0.459459	0.25	100	185	140
384	0	21	0	0	0	4	20	0	15	0	0	0	0	15	15	5	25	40	0	0	0	25	0	35	0	0	15	15	10	0	45	135	55	0.45	0.72973	0.392857	100	185	140
385	1	21	0	0	0	4	20	0	0	15	0	0	0	0	15	0	0	40	0	0	0	0	0	0	0	0	15	0	0	0	15	70	20	0.15	0.378378	0.142857	100	185	140
386	1	21	0	0	0	4	20	0	0	0	5	0	0	15	0	5	0	40	0	0	0	0	0	0	0	0	0	15	0	0	0	55	45	0	0.297297	0.321429	100	185	140
387	0	21	0	0	0	4	0	30	0	0	0	0	0	0	0	0	0	40	0	0	0	0	0	35	5	10	0	0	0	0	35	45	40	0.35	0.243243	0.285714	100	185	140
388	1	21	0	0	0	4	0	0	15	0	5	0	0	0	0	5	0	40	0	0	0	25	0	0	0	0	15	15	0	40	40	80	40	0.4	0.432432	0.285714	100	185	140
389	0	26	1	0	0	4	0	30	0	0	0	0	0	0	0	0	0	40	0	0	5	25	0	35	0	10	0	0	0	0	35	65	45	0.35	0.351351	0.321429	100	185	140
390	0	21	1	0	0	4	20	0	15	0	0	30	0	0	0	0	25	40	0	0	0	0	0	35	0	0	15	15	10	0	45	110	50	0.45	0.594595	0.357143	100	185	140
391	0	21	1	0	0	4	20	0	0	0	0	30	0	15	0	0	25	40	0	0	0	0	0	0	0	0	0	15	0	0	0	110	35	0	0.594595	0.25	100	185	140
392	0	21	1	0	0	4	0	0	15	0	0	0	30	0	0	0	0	40	0	0	0	0	0	35	0	0	0	15	0	40	75	40	60	0.75	0.216216	0.428571	100	185	140
393	0	21	1	0	0	4	0	0	0	0	0	0	0	15	0	0	25	40	0	0	0	0	0	0	0	0	0	15	10	0	10	80	15	0.1	0.432432	0.107143	100	185	140
394	1	22	1	0	0	4	20	0	15	0	0	30	30	0	0	0	0	40	0	0	0	25	0	0	0	0	0	0	0	0	0	95	65	0	0.513514	0.464286	100	185	140
395	1	21	1	0	0	4	0	30	0	0	0	30	0	0	0	0	25	40	0	0	5	0	0	0	0	0	0	0	0	40	40	95	35	0.4	0.513514	0.25	100	185	140
396	1	21	1	0	0	4	20	30	15	0	0	30	0	0	15	0	25	40	0	0	0	25	0	35	0	0	0	15	0	0	35	135	80	0.35	0.72973	0.571429	100	185	140
397	1	21	1	0	0	4	20	30	0	0	0	0	0	15	0	0	0	40	0	0	0	25	0	0	0	10	0	0	0	0	0	80	60	0	0.432432	0.428571	100	185	140
398	1	21	1	0	0	4	20	0	0	0	0	0	30	15	0	0	25	40	0	0	0	0	0	35	0	0	15	0	0	40	75	95	50	0.75	0.513514	0.357143	100	185	140
399	0	21	1	0	0	4	20	0	0	0	0	0	0	0	0	0	0	40	0	0	0	25	0	0	0	10	0	0	0	0	0	65	30	0	0.351351	0.214286	100	185	140
400	0	21	1	0	0	4	20	0	0	0	0	30	30	0	0	0	25	0	0	0	5	0	10	35	0	0	15	15	0	40	75	80	70	0.75	0.432432	0.5	100	185	140
401	0	21	1	0	0	4	20	0	0	0	0	0	0	0	15	0	0	40	0	0	0	0	0	35	0	0	0	15	0	40	75	55	35	0.75	0.297297	0.25	100	185	140
402	0	21	1	0	0	4	0	0	0	0	0	0	0	0	0	0	25	0	0	0	0	25	0	0	0	0	0	15	0	40	40	50	15	0.4	0.27027	0.107143	100	185	140
